# Supplementary material for: Reengineering of the carbon-to-acetylene process featuring negative carbon emission
Source: Royal Society of Chemistry journal article supplement (doi:10.1039/d3gc01775c), 2023-01-01
Supplement: d3gc01775c1.pdf [file d3gc01775c1.pdf]

Electronic Supplementary information for

## Reengineering of the carbon-to-acetylene process featuring negative carbon emission

Miao Li<sup>a,b</sup>, Hong Zhao<sup>a,\*</sup>, Siyuan Chen<sup>a</sup>, Siyuan liu<sup>a</sup>, Long Yan<sup>c</sup>, Chen Hou<sup>a</sup>, Biao Jiang<sup>a,\*</sup>

<sup>a</sup>: Green Chemical Engineering Research Centre, Shanghai Advanced Research Institute,  
Chinese Academy of Sciences, Shanghai 201210, China

<sup>b</sup>: University of Chinese Academy of Sciences, Beijing 100049, China

<sup>c</sup>: School of Chemistry and Chemical Engineering, Yulin University, Yulin 719000, China

\*: Corresponding author: Email: [zhaoh@sari.ac.cn](mailto:zhaoh@sari.ac.cn), [jiangb@sari.ac.cn](mailto:jiangb@sari.ac.cn)

### Content

|                                                                                                                                                                                                |   |
|------------------------------------------------------------------------------------------------------------------------------------------------------------------------------------------------|---|
| <b>Table S1</b> Thermodynamic initial temperature and theoretical mass loss* of possible reactions for BaC <sub>2</sub> and CaC <sub>2</sub> synthesis .....                                   | 2 |
| <b>Table S2</b> Mass balance of Ba before and after reaction at different temperature and reaction time.                                                                                       | 2 |
| <b>Fig. S1</b> (a)The corresponding EDS mapping images of (a)reactants, heating products at 1150 °C, (c) at 1400 °C for 60 min, and (d) at 1550 °C for 30 min.....                             | 2 |
| <b>Fig. S2 Pictures of reactant pellets and product pellets.</b> (a) Reactant pellets. (b) Product pellets, BaC <sub>2</sub> content: 91.4 wt%, experimental conditions: 1550 °C, 30 min. .... | 3 |
| <b>Fig. S3 Solubility of Ca(OH)<sub>2</sub> and Ba(OH)<sub>2</sub> in water.</b> ....                                                                                                          | 3 |
| <b>Fig. S4</b> (a) SEM images of recycled BaCO <sub>3</sub> . (b) SEM images of fresh BaCO <sub>3</sub> . ....                                                                                 | 3 |

**Table S1** Thermodynamic initial temperature and theoretical mass loss\* of possible reactions for BaC<sub>2</sub> and CaC<sub>2</sub> synthesis

|                                         | Reaction                                    | Theoretical initial temperature | Theoretical mass loss |
|-----------------------------------------|---------------------------------------------|---------------------------------|-----------------------|
| BaC <sub>2</sub> synthesis <sup>1</sup> | BaCO <sub>3</sub> +C=BaO+2CO                | 1047°C                          | 22.8 wt.%             |
|                                         | BaCO <sub>3</sub> +4C=BaC <sub>2</sub> +3CO | 1242°C                          | 34.2 wt.%             |
|                                         | BaCO <sub>3</sub> =BaO+CO <sub>2</sub>      | 1558°C                          | 18.0 wt.%             |
|                                         | BaO+3C=BaC <sub>2</sub>                     | 1533°C                          | 11.4 wt.%             |
| CaC <sub>2</sub> synthesis              | CaCO <sub>3</sub> =CaO+CO <sub>2</sub>      | 887°C                           | 29.7 wt.%             |
|                                         | CaCO <sub>3</sub> +C=CaO+2CO                | --                              | 37.8 wt.%             |
|                                         | C+CO <sub>2</sub> =2CO                      | 700°C                           | --                    |

\*Reactants contains 1 mol carbonate and 4 mol carbon were used as reactants

**Table S2** Mass balance of Ba before and after reaction at different temperature and reaction time

|        | 1400°C | 1450°C | 1500°C | 1550°C |
|--------|--------|--------|--------|--------|
| 20 min | 0.63   | 0.76   | 0.76   | 0.68   |
| 30 min | 0.66   | 0.73   | 0.44   | 0.71   |
| 40 min | 0.33   | 0.53   | 0.24   | 0.74   |
| 50 min | 0.29   | 0.60   | 0.89   | 0.65   |
| 60 min | 0.73   | 0.71   | 0.58   | 0.60   |

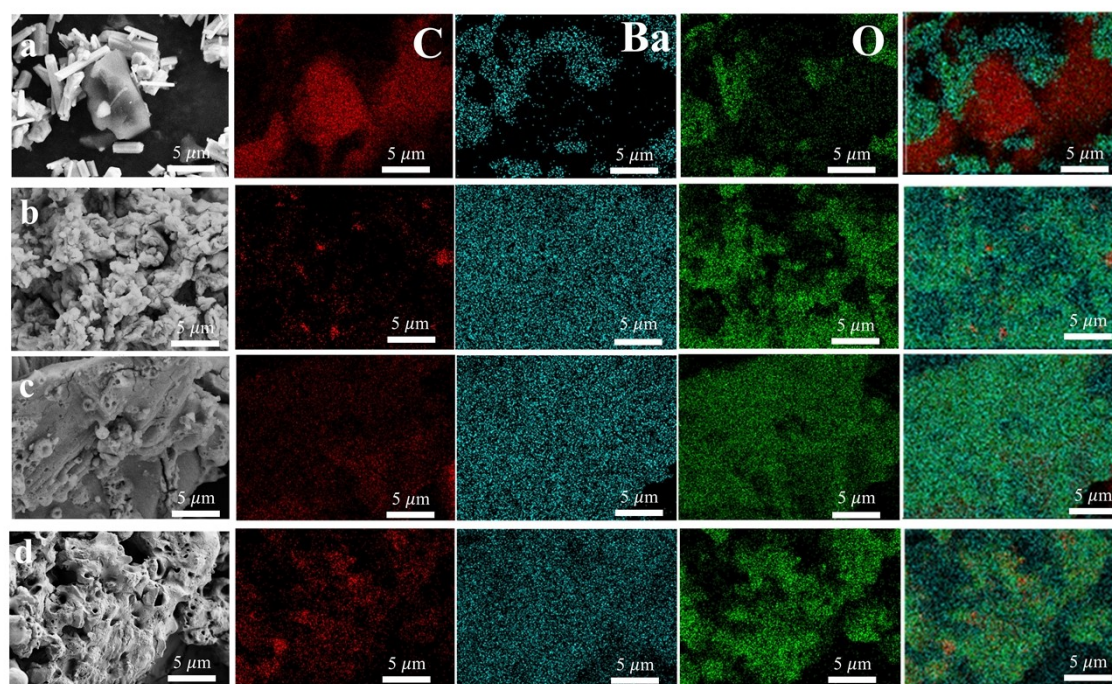

**Fig. S1** (a)The corresponding EDS mapping images of (a)reactants, heating products at 1150 °C, (c) at 1400 °C for 60 min, and (d) at 1550 °C for 30 min.

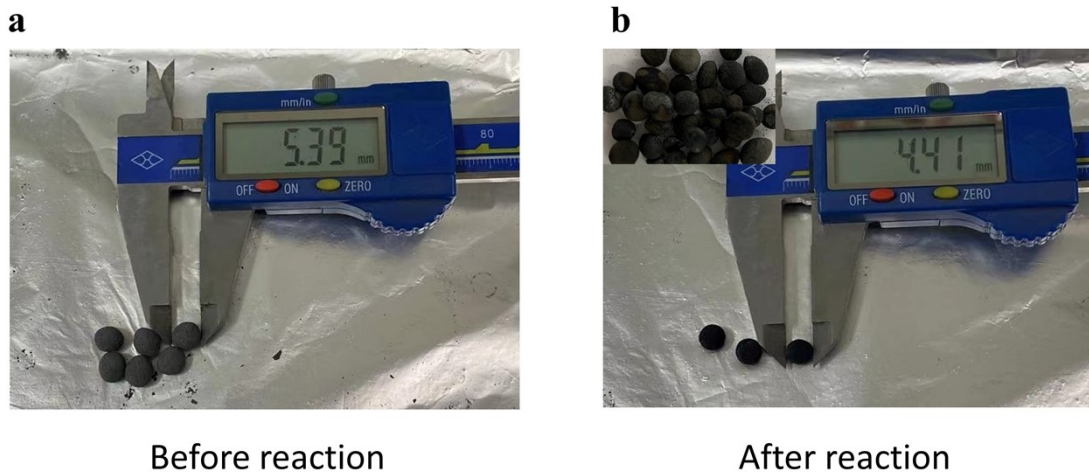

**Fig. S2** Pictures of reactant pellets and product pellets. (a) Reactant pellets. (b) Product pellets, BaC<sub>2</sub> content: 91.4 wt%, experimental conditions: 1550 °C, 30 min.

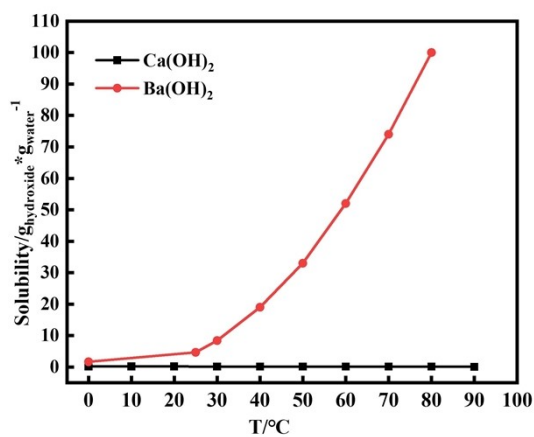

**Fig. S3** Solubility of Ca(OH)<sub>2</sub> and Ba(OH)<sub>2</sub> in water.

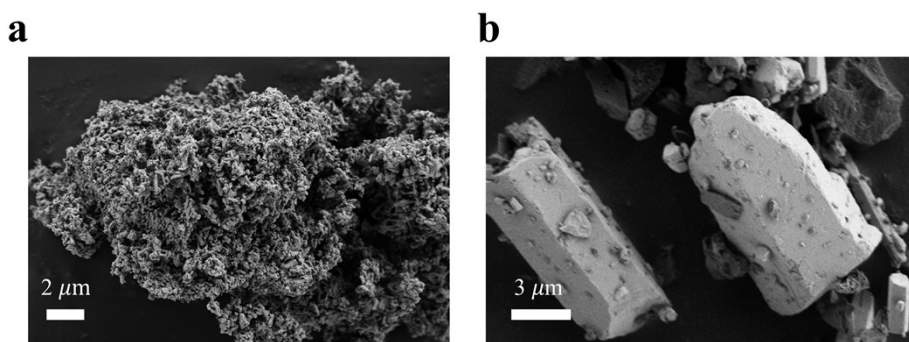

**Fig. S4** (a) SEM images of recycled BaCO<sub>3</sub>. (b) SEM images of fresh BaCO<sub>3</sub>.

## References

1. L. Miao, Z. Hong, J. Biao, C. Siyuan and Y. Long, *CIESC Journal*, 2022, **73**, 1908-1919.
